# Supplementary material for: Propofol-induced deep sedation reduces emotional episodic memory reconsolidation in humans
Source: PubMed Central journal article supplement — Sci Adv. 2019 Mar 20;5(3):eaav3801. doi: 10.1126/sciadv.aav3801 (PMC6426467; doi:10.1126/sciadv.aav3801), 2019-03-20
Supplement: aav3801_SM.pdf [file aav3801_SM.pdf]

## Supplementary Materials for

### **Propofol-induced deep sedation reduces emotional episodic memory reconsolidation in humans**

Ana Galarza Vallejo, Marijn C. W. Kroes, Enrique Rey, Maria Victoria Acedo, Stephan Moratti, Guillén Fernández, Bryan A. Strange\*

\*Corresponding author. Email: [bryan.strange@upm.es](mailto:bryan.strange@upm.es)

Published 20 March 2019, *Sci. Adv.* **5**, eaav3801 (2019)  
DOI: 10.1126/sciadv.aav3801

#### **This PDF file includes:**

Fig. S1. DSST performance for groups A and B.

Fig. S2. Memory reactivation scores.

Fig. S3. Reconsolidation impairment is not correlated with propofol dose.

## SUPPLEMENTARY MATERIALS

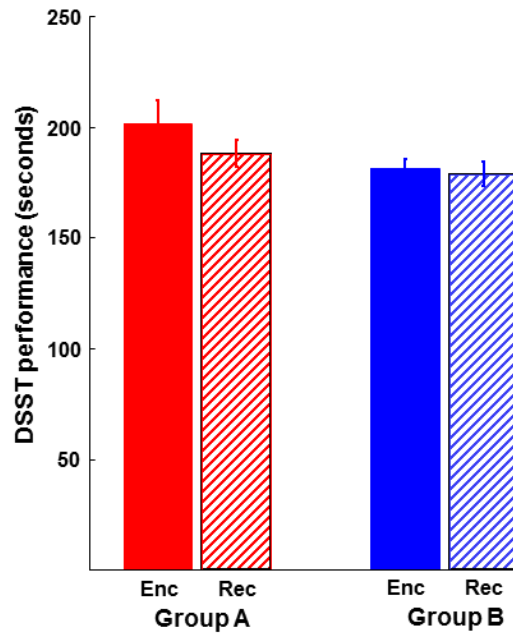

**Fig. S1. DSST performance for groups A and B.** The DSST was administered twice, before encoding of both stories and before recognition memory testing. Group A ( $n = 25$  subjects) encoding mean (s.e.m.): 201.92 (9.81), recognition 188.08 (6.09); Group B ( $n = 24$  subjects) encoding mean (s.e.m.): 181.71 (3.99), recognition 178.83 (5.65).

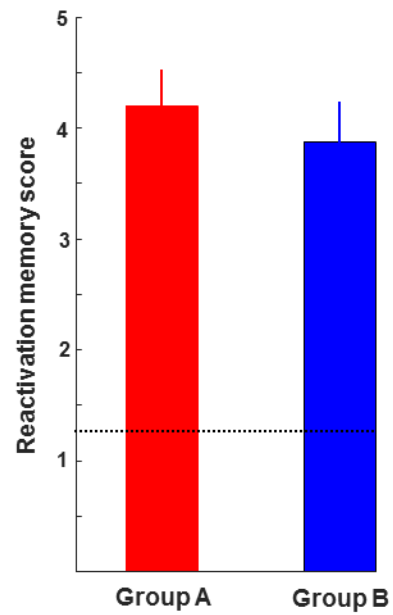

**Fig. S2. Memory reactivation scores.** Both groups show comparable memory reactivation performance (maximum score of 6; chance level 1.25, dashed line). Group A ( $n = 25$  subjects) mean (s.e.m.): 4.20 (0.30); Group B ( $n = 24$  subjects) mean: 3.87 (0.34).

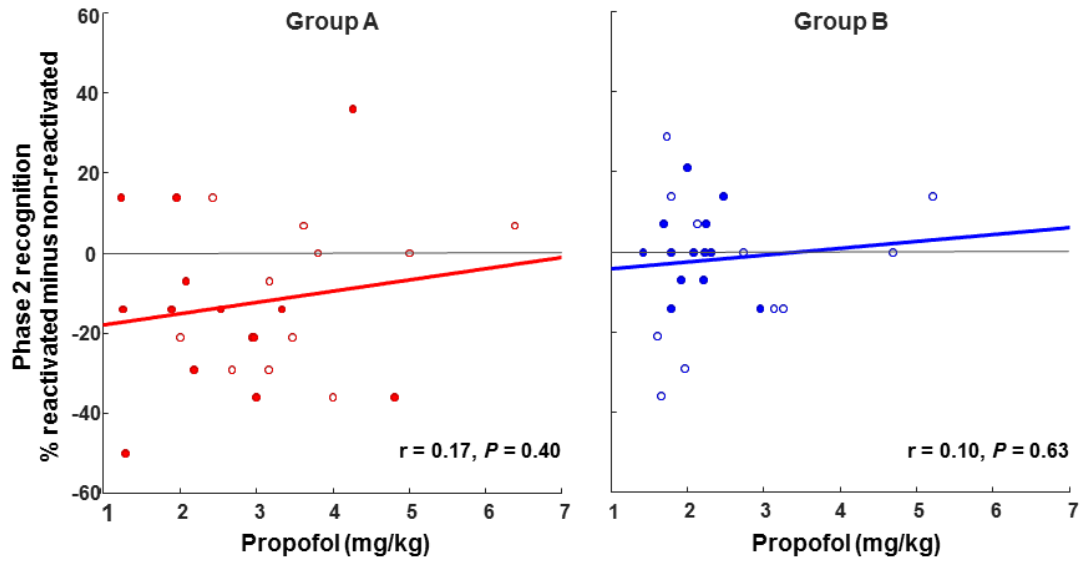

**Fig. S3. Reconsolidation impairment is not correlated with propofol dose.** The difference in memory score for the arousing phase 2 of the reactivated vs. non-reactivated story was not correlated with total propofol dose in either group A or B. Participant only receiving propofol ( ○ ) or receiving other pharmacological agent(s) in addition to propofol ( ● ) are plotted.
